# Supplementary material for: Yet More Evidence of Collusion: a New Viral Defense System Encoded by Gordonia Phage CarolAnn
Source: PubMed Central journal article supplement (PMC6426606; doi:10.1128/mbio.02417-18), 2019-03-19
Supplement: mBio.02417-18-sf003.pdf [file mBio.02417-18-sf003.pdf]

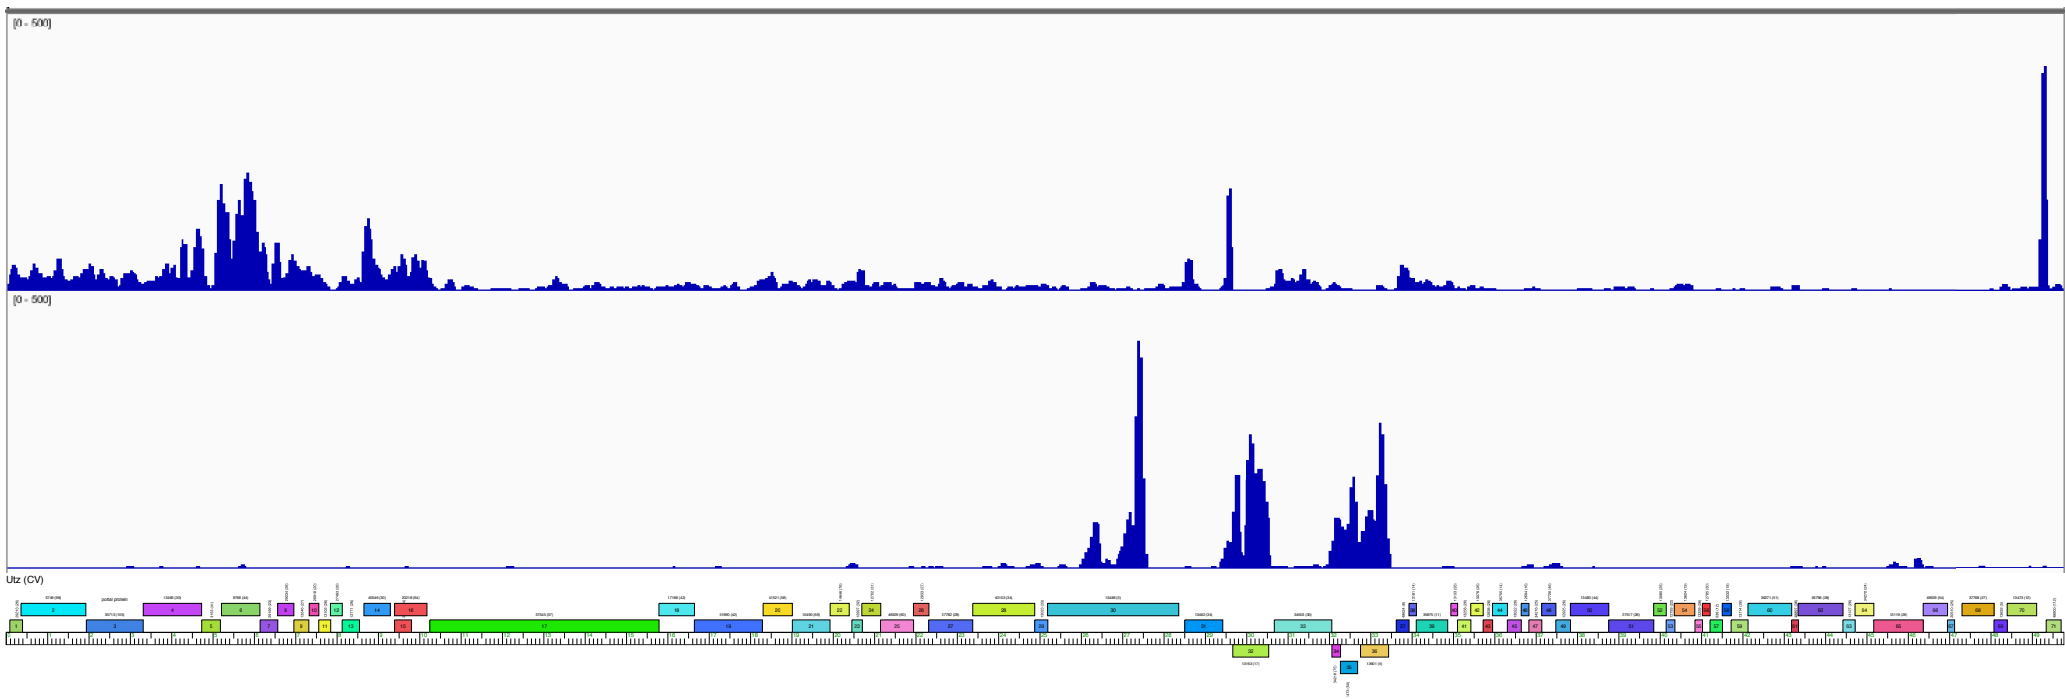

Figure S3
